# Supplementary material for: Experience sampling method studies in physical activity research: the relevance of causal reasoning
Source: Springer Nature journal article supplement (doi:10.1186/s12966-025-01723-w), 2025-03-05
Supplement: MOESM3 [file 12966_2025_1723_MOESM3_ESM.pdf]

# Directed acyclic graphs (DAGs)

## short introduction



Expert consultation DAG development

# Project aim

To examine the causal impact of physical activity on older adults' daily cognitive performance

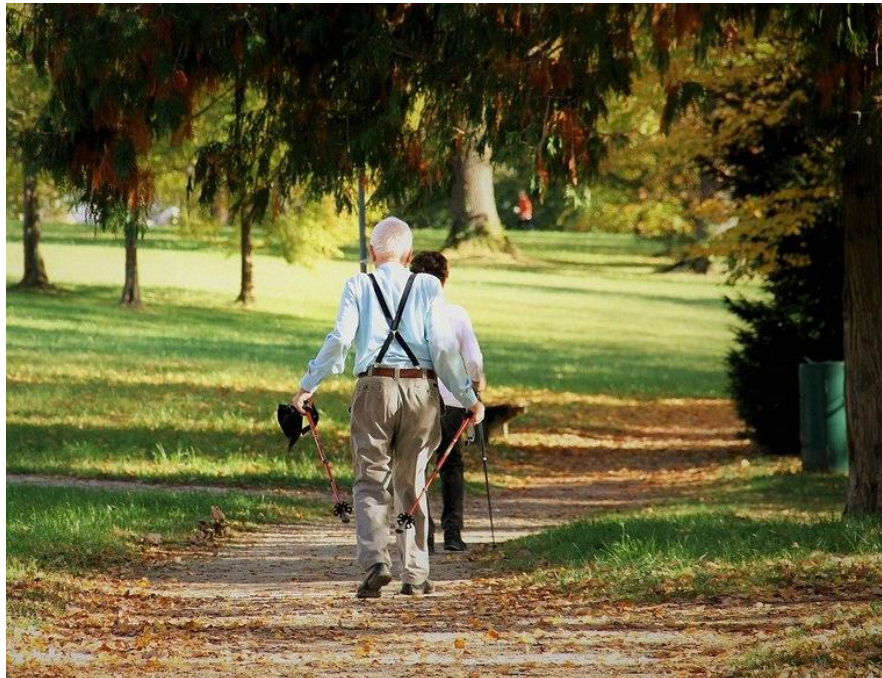

# Causal effect or association?

Causal inference is a core task of health promotion research:

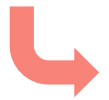

Basis for developing guidelines and interventions to alter people's behaviour

However, when using observational designs, we often do not dare to say we aim to examine causal effects!

# Causal effect or association?

We do not dare to speak about causation (with observational data)

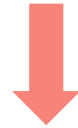

We do not think causally

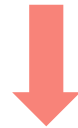

Our observed associations are probably biased

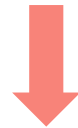

We make (careful) causal conclusions

Interesting article on this topic: Hernan, AJPH, 2018, Vol 108 (5)

# Introduction to DAGs: a paradox

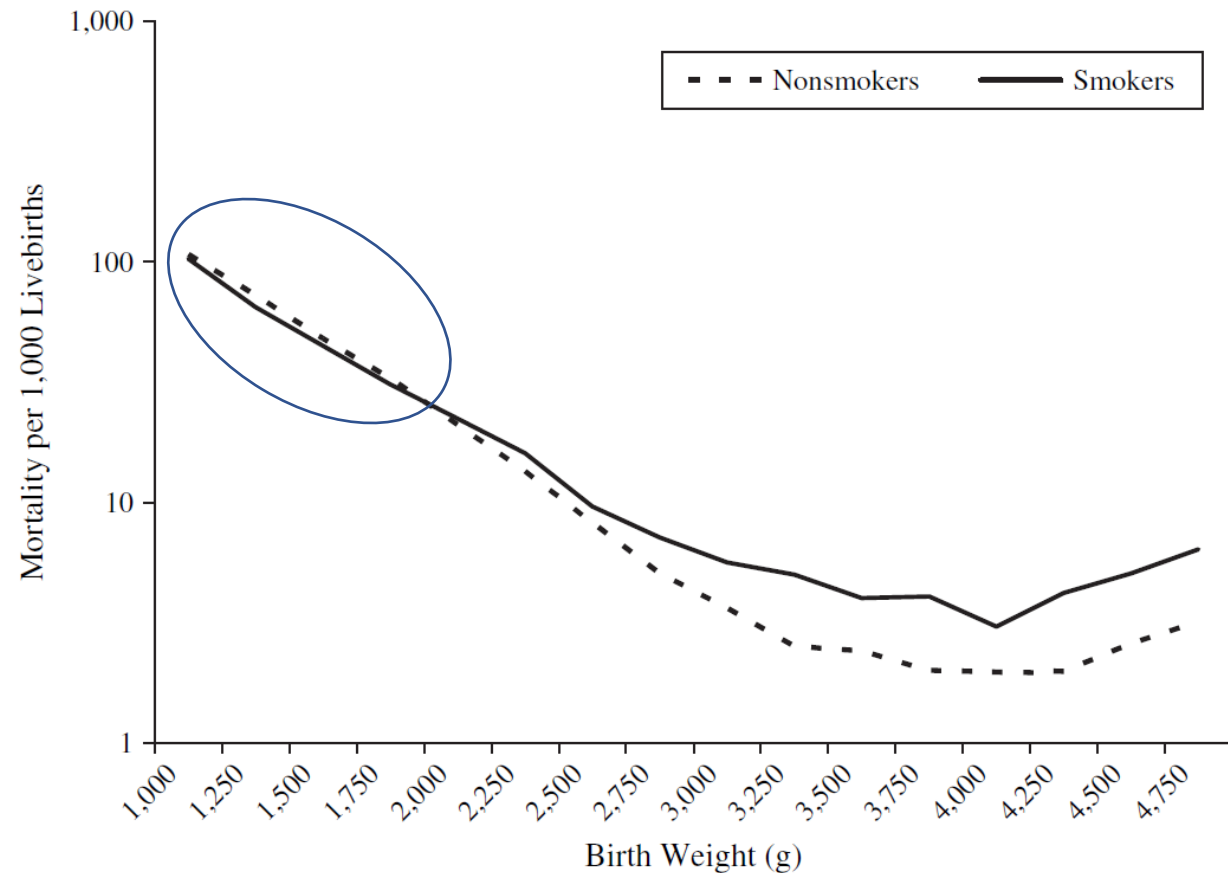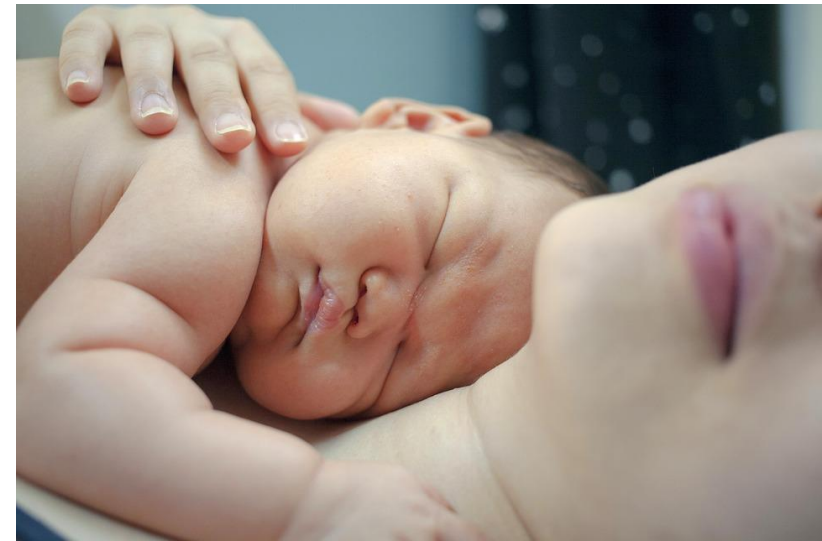

# Five sources of association

1

Random fluctuation

2

X → Y

3

Y → X

4

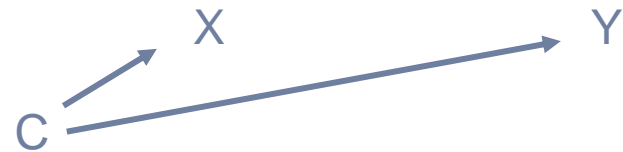

5

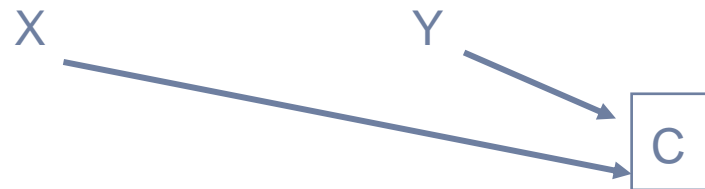

# Five sources of association

1

Random fluctuation

2

PA → cognitive performance

3

Cognitive performance → PA

4

Age → PA → cognitive performance

5

PA → cognitive performance → Living independently

# Directed acyclic graphs to the rescue!

What?

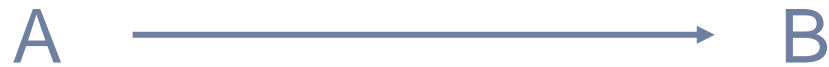

- Graphical system of nodes (variables) along with **directed edges**
- Visually encode researchers' **a priori assumptions** about causal relations among the exposure, outcomes and covariates
- **Without cycles**



# Directed acyclic graphs to the rescue!

What?

How?

- Directed paths or causal paths
- Undirected paths or spurious paths

# Directed acyclic graphs to the rescue!

What?

How?

Directed paths or causal paths

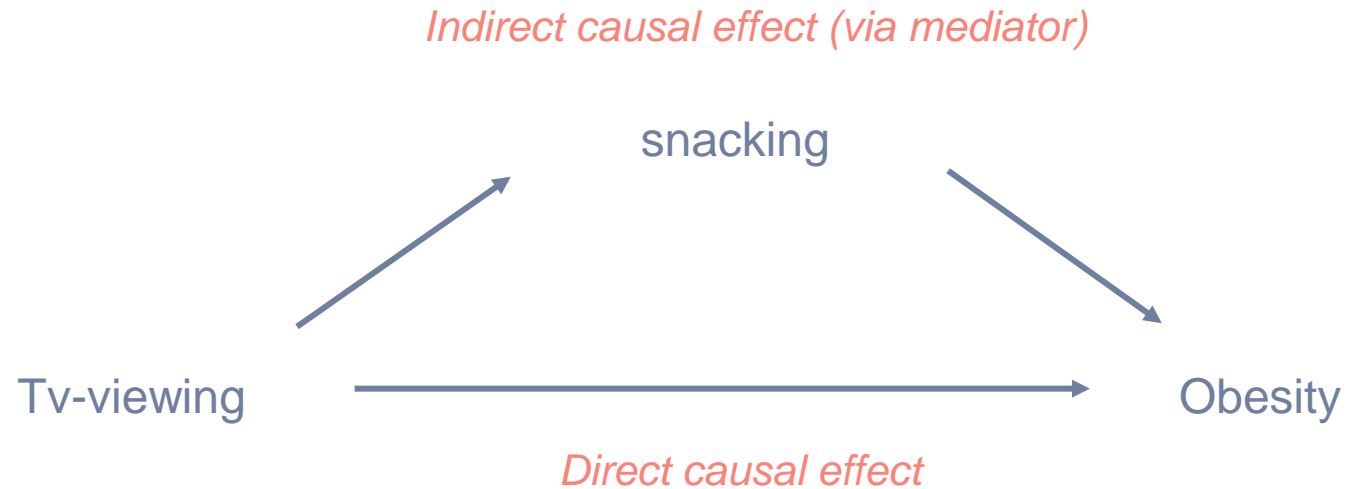

# Directed acyclic graphs to the rescue!

What?

How?

Directed paths or causal paths

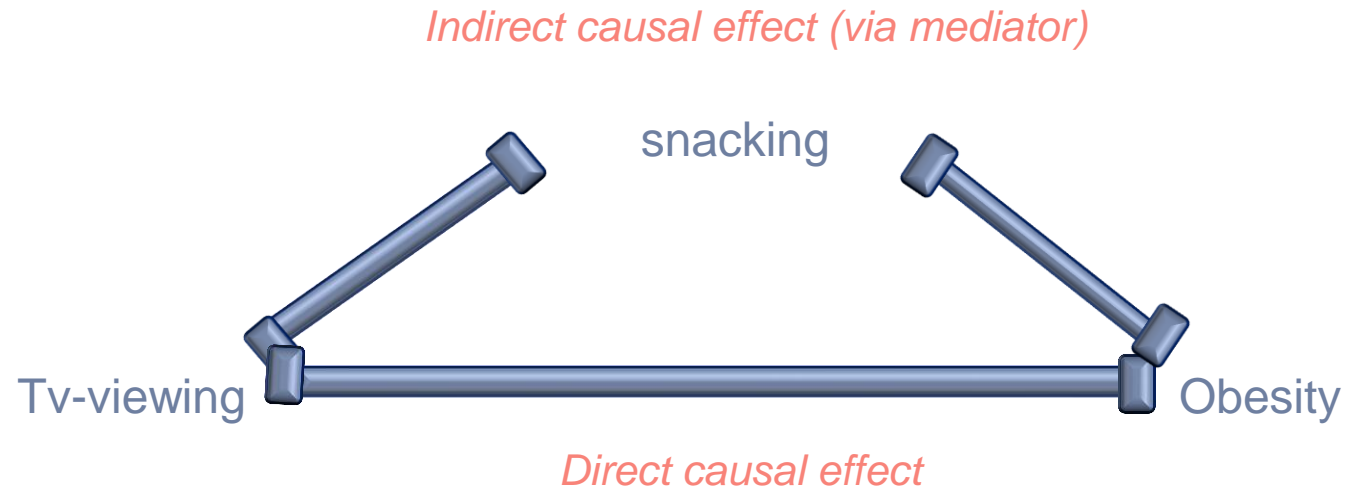

# Directed acyclic graphs to the rescue!

What?

How?

Directed paths or causal paths

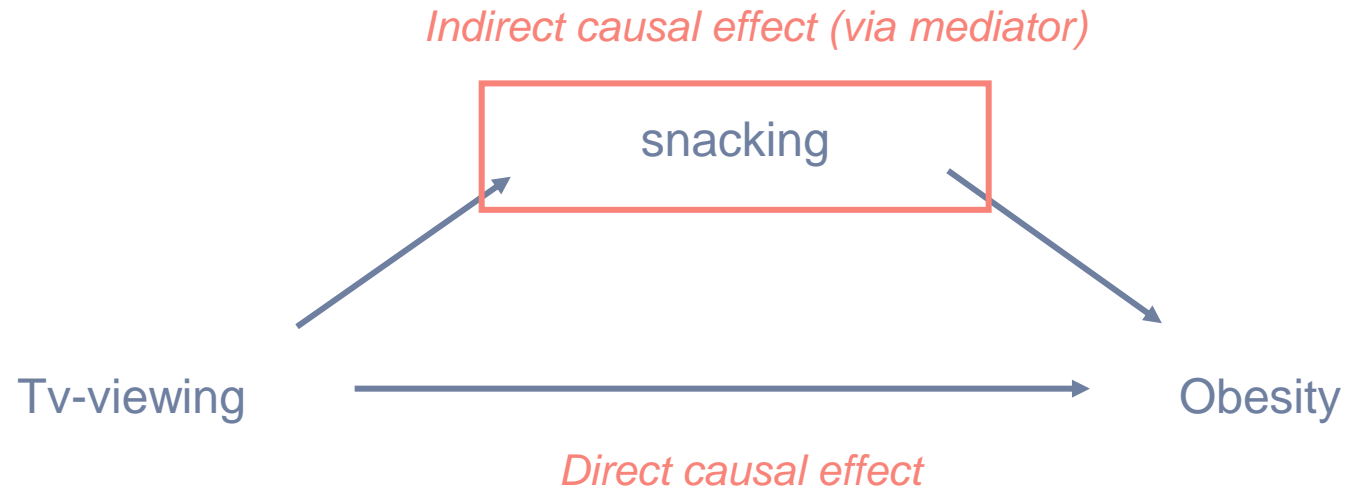

# Directed acyclic graphs to the rescue!

What?

How?

## Undirected paths or spurious paths

- 2 variables share the same cause
- Association transmitted by backdoor path is non-causal (confounding)

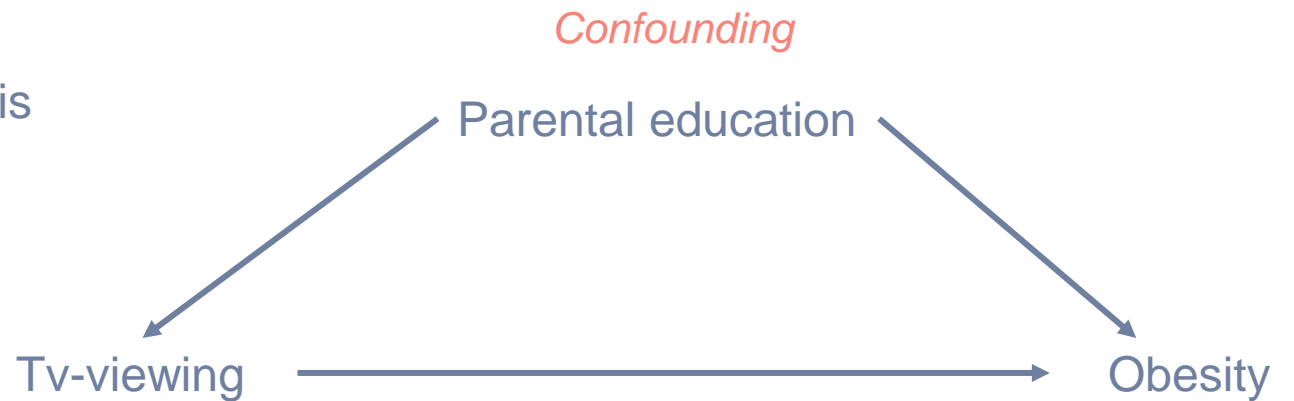

# Directed acyclic graphs to the rescue!

What?

How?

## Undirected paths or spurious paths

- 2 variables share the same cause
- Association transmitted by backdoor path is non-causal (confounding)

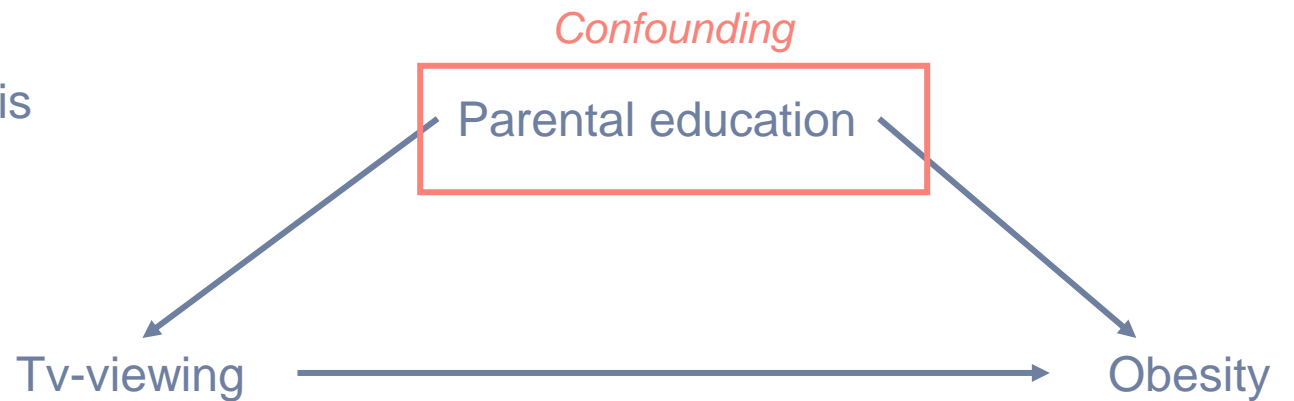

# Directed acyclic graphs to the rescue!

What?

How?

## Colliders

- 2 variables have the same effect
- No association transmitted unless we control for it!

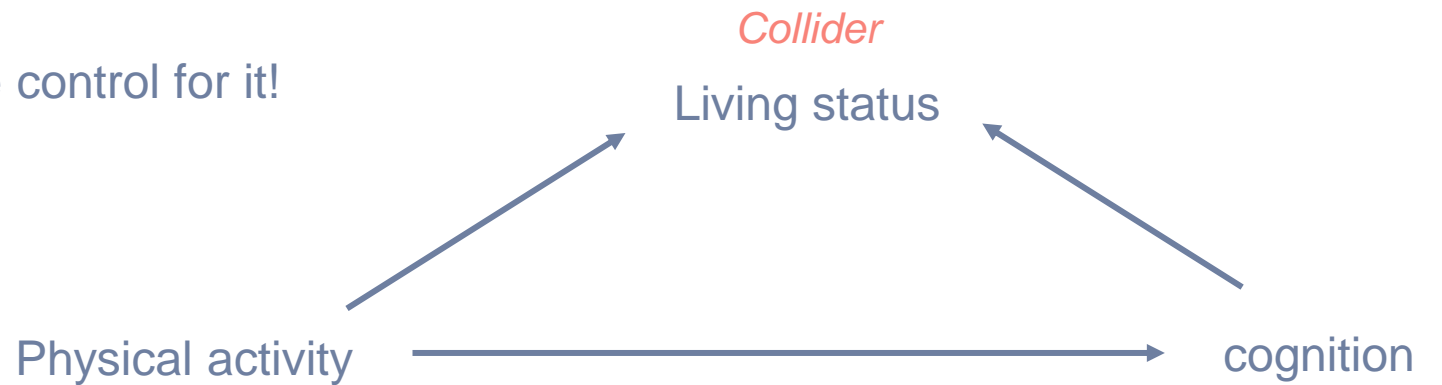

# Directed acyclic graphs to the rescue!

What?

How?

## Colliders

- 2 variables have the same effect
- No association transmitted unless we control for it!

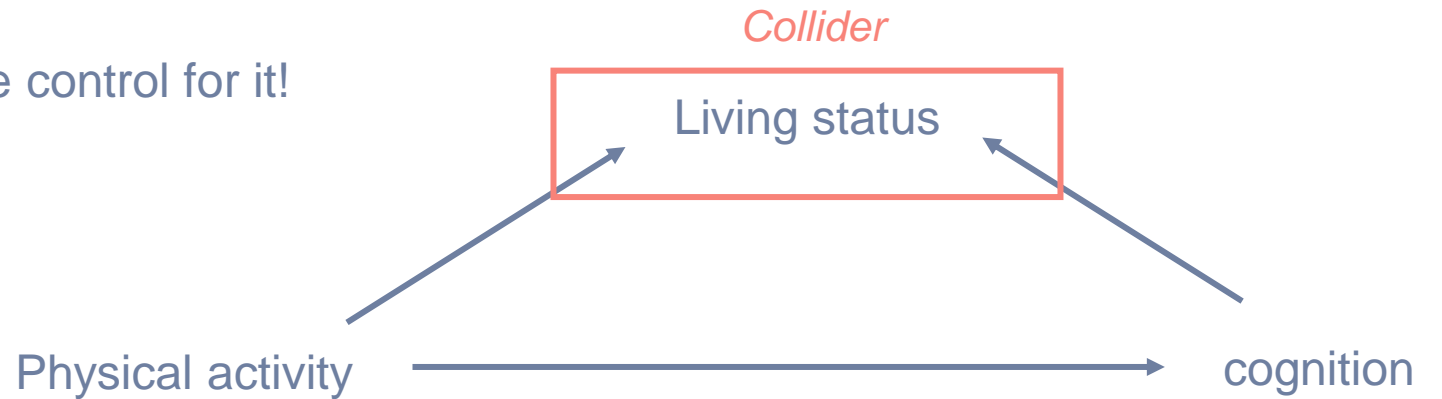



# Directed acyclic graphs to the rescue!

What?

How?

## D-separation

Change status of a path from open to close or vice versa by **acting on a variable**

Via study design

Via statistical adjustment

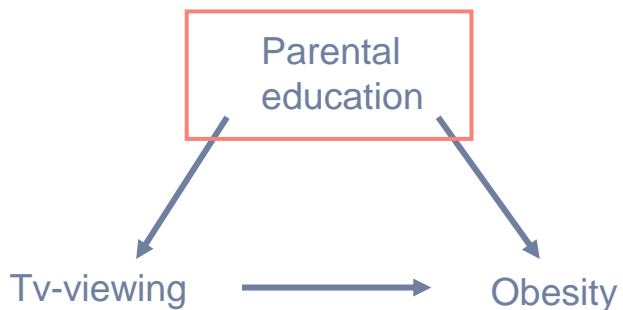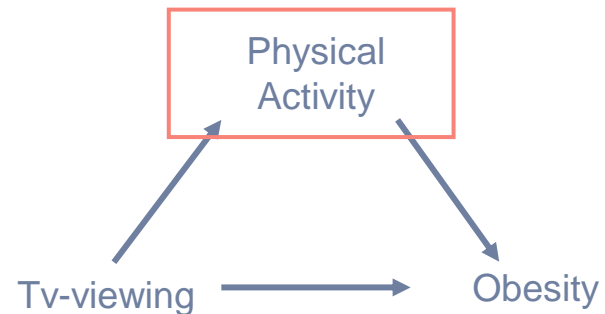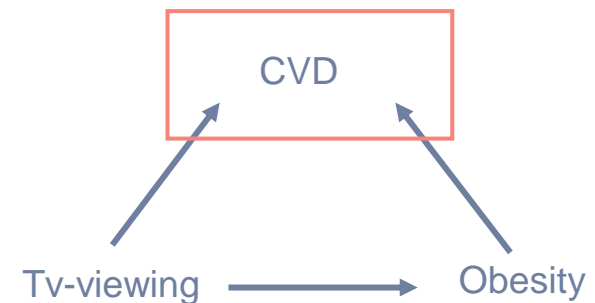

# Directed acyclic graphs to the rescue!

What?

How?

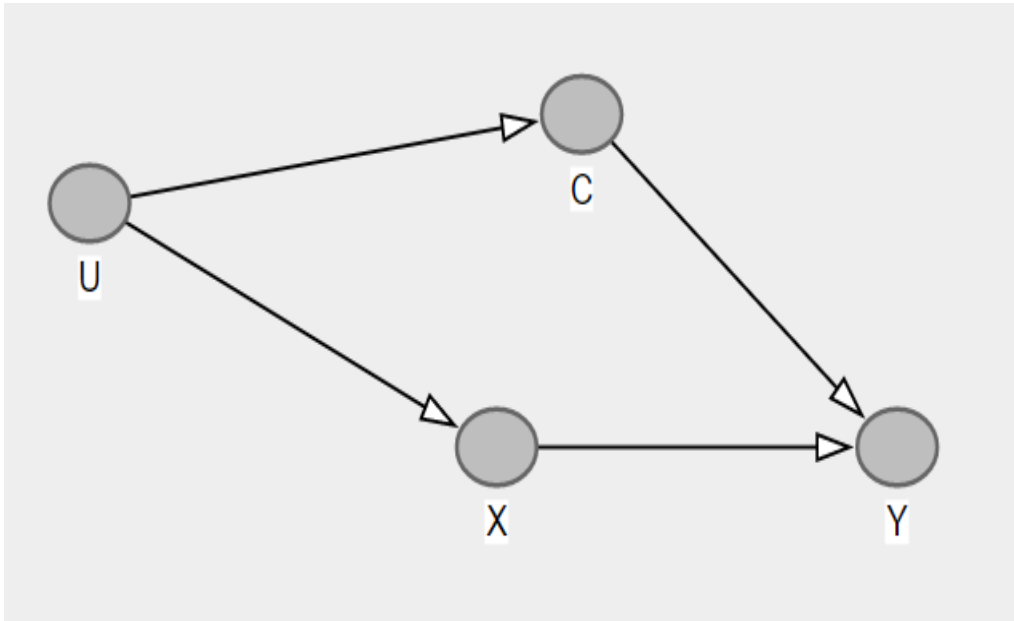

Want to estimate the causal effect of X on Y

C = measured variable

U = unmeasured variable

# Directed acyclic graphs to the rescue!

What?

How?

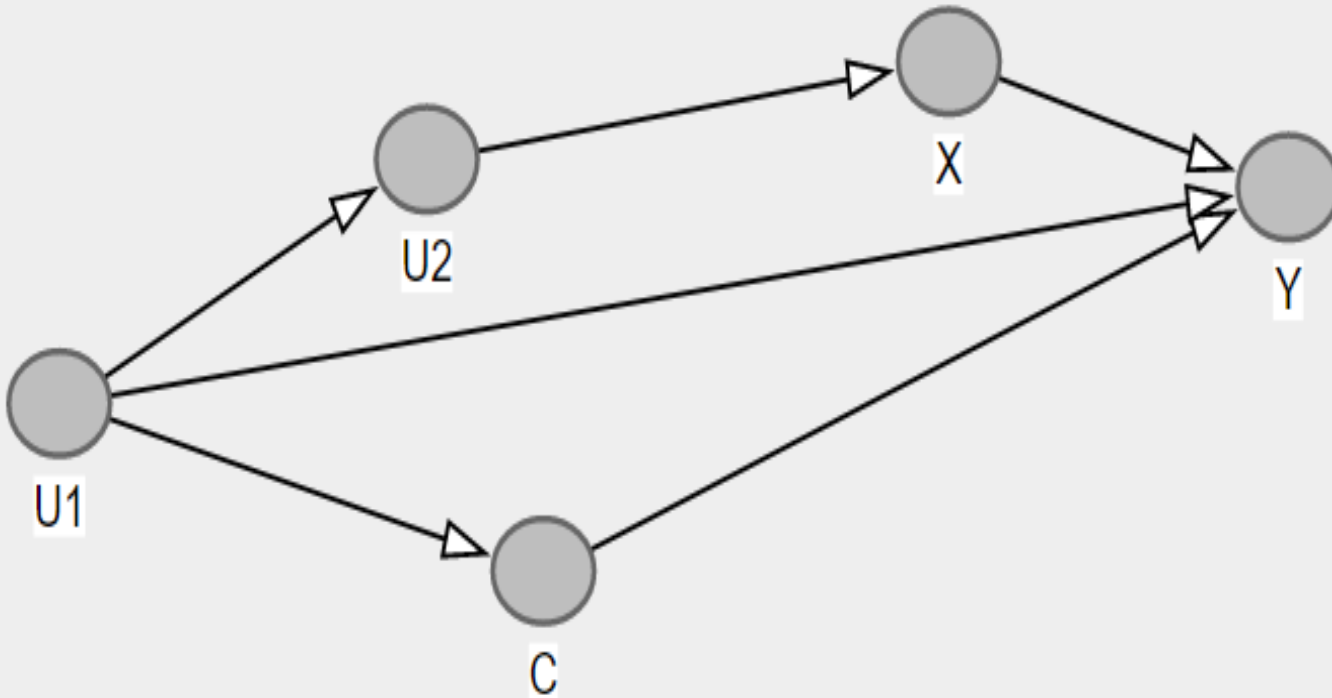

Want to estimate the causal effect of X on Y

C = measured variable

Us = unmeasured variables

# Directed acyclic graphs to the rescue!

What?

How?

Assumptions

- No omitted confounding pathways
- Removing an arrow is a stronger assumption than adding an arrow

# Directed acyclic graphs to the rescue!

What?

How?

Assumptions

Result

(A)

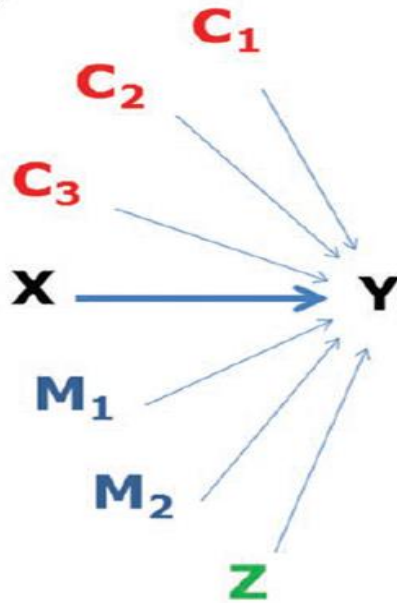

(B)

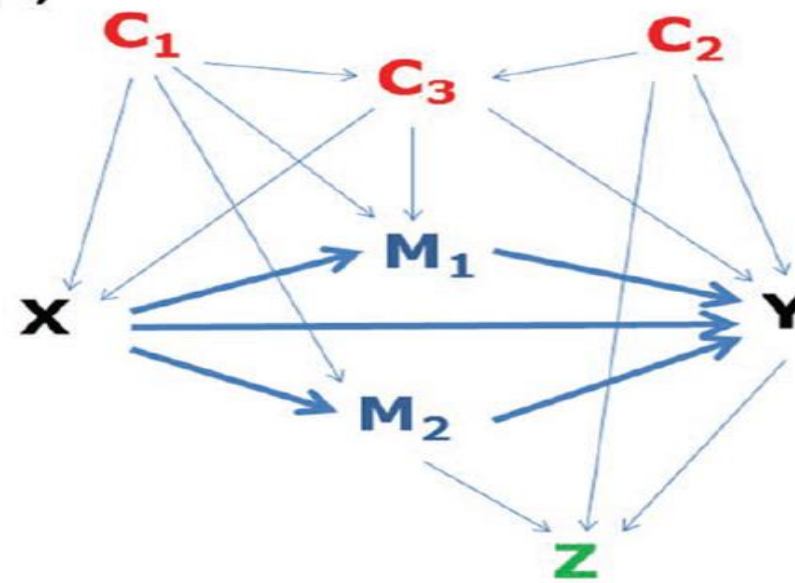

# Back to our paradox

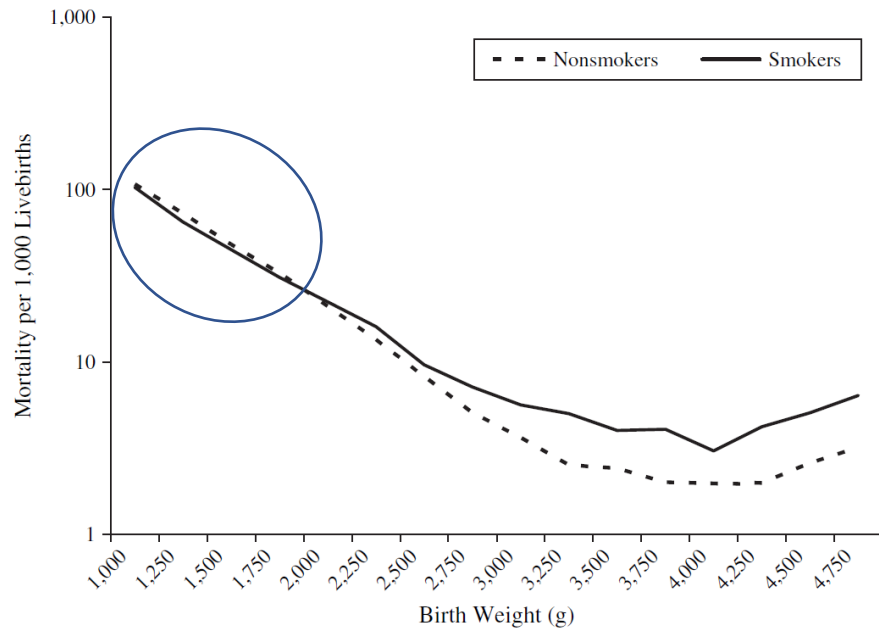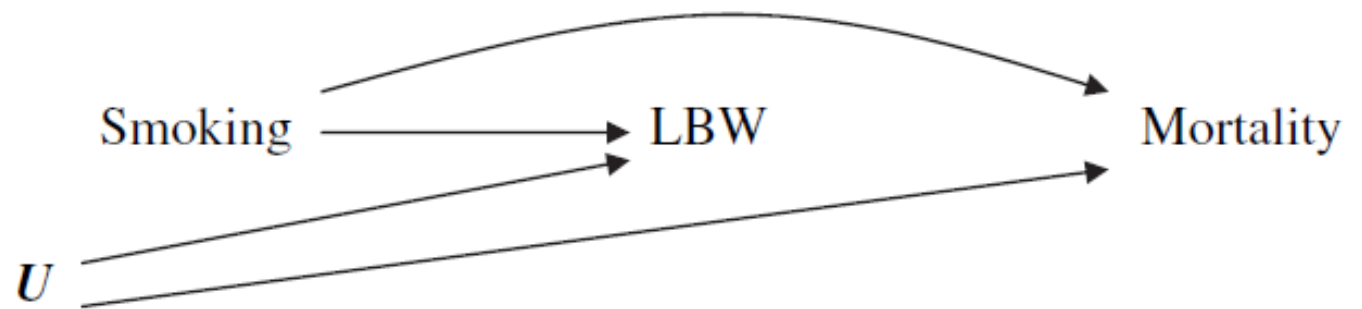

# Thanks

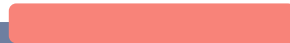

Louise Poppe

Expert consultation DAG development
